# Supplementary material
Source: HighWire-hosted journal article supplement (https://bmjopen.bmj.com/content/12/8/e055460)
Supplement: inline-supplementary-material-3 [file inline-supplementary-material-3.pdf]

### Supplementary File 3. Search String

Databases: MEDLINE, Science Citation Index, Academic Search Complete, CINAHL, APA Psycinfo, Health Source: Nursing/Academic Edition, and Psychology and Behavioural Sciences Collection

Search String:

("general practitioner" OR "primary care physician" OR "family physician" OR "family practitioner" OR GP OR doctor OR specialist OR oncologist) AND ("model of care" OR "shared-care" OR "shared care" OR "follow-up care" OR "follow up care") AND (Cancer OR oncolog\* OR neoplasm)

Limits:

Date range: 01/01/1999 - 31/12/2021

Language: English

Available: online, full-text, peer-reviewed
